1 Title page

2

3 **Title:** Seasonal variation in the relative importance of assembly processes in marine fish  
4 communities as determined by environmental DNA analyses

5

6 **Authors:** Naoto Shinohara<sup>1\*</sup>, Yuki Hongo<sup>1</sup>, Momoko Ichinokawa<sup>1</sup>, Shota Nishijima<sup>1</sup>,  
7 Shuhei Sawayama<sup>1</sup>, Hiroaki Kurogi<sup>1</sup>, Yasuyuki Uto<sup>2</sup>, Hisanori Mita<sup>3</sup>, Mitsuhiro Ishii<sup>3</sup>,  
8 Akane Kusano<sup>4</sup>, Seiji Akimoto<sup>5</sup>

9 **Affiliations:**

10 <sup>1</sup>Fisheries Resources Institute, Japan Fisheries Research and Education Agency, Yokohama,  
11 Japan

12 <sup>2</sup>Marine Industries Promotion Division, Chiba Prefectural Government, Chiba, Japan

13 <sup>3</sup>Chiba Prefectural Fisheries Research Center, Chiba, Japan

14 <sup>4</sup>Fisheries Division, Environment and Agriculture Bureau, Kanagawa Prefectural  
15 Government, Yokohama, Japan

16 <sup>5</sup> Fisheries Research Institute of Kanagawa Prefecture, Yokohama, Japan

17 \* Corresponding author

18 Email: [naotos.biod@gmail.com](mailto:naotos.biod@gmail.com)

19

20

21 **Abstract** (200 / 200 words)

22 Compositional variation among local communities is a result of environmental (e.g.,  
23 environmental filtering) and spatial (e.g., dispersal limitation) processes. Growing evidence  
24 suggests that their relative importance varies temporally, but little is known about the  
25 short-time scale dynamics, that is, seasonality. Using marine fish communities in a  
26 Japanese bay as a model system, we tested the hypothesis that seasonal changes in the  
27 environment induce a shift in the relative importance of environmental and spatial  
28 processes. We used one-year monthly monitoring data obtained using environmental DNA  
29 and conducted a variation partitioning analysis to decompose the two processes. The  
30 relative importance of environmental and spatial processes was comparable averaged over  
31 the year but changed seasonally. During summer, when lower dissolved oxygen  
32 concentrations may adversely affect organisms, species composition was more explained  
33 by space despite larger environmental heterogeneity than in other seasons. This suggests  
34 that environmental processes weakened during the season with extremely severe  
35 environments, likely due to the random loss of individuals. We conclude that the assembly  
36 processes of communities of mobile organisms, such as fishes, can shift even within a year  
37 in response to seasonal changes in environmental severity. The results also indicate the  
38 applicability of eDNA techniques for community assembly studies.

39

40 **Keywords:**

41 Community assembly, dispersal limitation, eDNA, environmental filtering, fish, temporal  
42 assembly

43

## 44 **Background**

45 Understanding the processes structuring local communities has been a central challenge in  
46 ecology (Hutchinson 1959, HilleRisLambers et al. 2012). Local communities are structured  
47 by the interaction of two types of assembly processes (Cottenie 2005, Mouillot 2007, Chase  
48 and Myers 2011). Environmental processes affect species composition in a deterministic  
49 manner, such that the local environment sorts species that cannot colonise and persist in a  
50 given habitat. Conversely, spatial processes, such as dispersal limitation and random  
51 migration, can influence the local community structure in a more stochastic manner,  
52 irrespective of species properties (Sale 1978, Hubbell 2001). With the increasing  
53 acknowledgement that both processes act in concert, much research has been devoted to  
54 understanding their relative importance (Cottenie 2005, Chase and Myers 2011, Ford and  
55 Robert 2018). Previous studies have revealed the changes in the importance of spatial and  
56 environmental processes over time. Generally, spatial processes are more relevant during  
57 earlier phases of community assembly, whereas environmental processes occur during later  
58 phases because of the time lag of species colonisation (Allen et al. 2011, Alexander et al.  
59 2012, Helsen et al. 2013). These insights have suggested that natural communities are not at  
60 equilibrium but instead are in the transient course of approaching it, and are key to a  
61 holistic understanding of the mechanisms that shape community structures over long  
62 temporal scales (Chang and HilleRisLambers 2016), from years (Helsen et al. 2013) to  
63 decades (Allen et al. 2011, Alexander et al. 2012).

64         Despite the growing evidence that community assembly processes vary temporally,  
65 little attention has been given to short temporal scales such as seasonal dynamics (Holyoak  
66 et al. 2020), probably reflecting the biased focus of previous studies on organisms with low

67 mobile ability, such as plants (Alexander et al. 2012, Helsen et al. 2013) or microorganisms  
68 in closed water systems (Allen et al. 2011). As mobile organisms can move between  
69 habitats quickly in response to environmental changes, the relative importance of  
70 environmental and spatial processes can vary even within a year. For example, a limited  
71 number of studies have suggested that the interspecific interaction among riverine fish  
72 species is stronger in the dry season when individuals are densely concentrated in limited  
73 habitual areas (Fitzgerald et al. 2017). In contrast, Mouchet et al. (2013) showed that fish  
74 assemblages in a lagoon is constantly regulated by the environment throughout a year.  
75 Therefore, whether the seasonal variation of assembly processes is a commonly observed  
76 pattern remains an open question. Short-time scale variation in the relative importance of  
77 spatial and environmental processes, in contrast to the long-time scale variation, would  
78 imply that the assembly processes temporally fluctuate irrespective of the equilibrium  
79 states.

80 In addition, there are contrasting predictions regarding the consequences of  
81 seasonal changes in the environment. During the season with harsh conditions, the  
82 environment is expected to have a stronger effect on the species composition (Chase 2007,  
83 Guo et al. 2014). However, it is also probable that an extremely severe environment can  
84 induce extinction or recolonisation of individuals irrespective of species traits, negating the  
85 effect of environmental processes (Lepori and Malmqvist 2009). In particular, knowledge is  
86 scarce in open systems such as the ocean, where the movement of individuals is less limited  
87 and can be more responsive to environmental changes (Travers et al. 2006, Kopp et al.  
88 2012). Furthermore, as marine ecosystems are structured both vertically and horizontally  
89 (Travers et al. 2006, McClain and Rex 2015), looking into the environmental gradient along

90 water depth would be essential for assessing fish community assembly. The knowledge gap  
91 in marine ecosystems partly stems from the considerable effort required to assess marine  
92 fish species composition at multiple sites, multiple water depths, and continual time points  
93 within a year (Yamamoto et al. 2017).

94 This difficulty can be substantially overcome by environmental DNA (eDNA)  
95 analysis, which has emerged as a powerful and efficient tool for monitoring biodiversity,  
96 especially in aquatic ecosystems (Bohmann et al. 2014; Deiner et al. 2017;  
97 Lacoursière-Roussel et al. 2018). By extracting genetic materials shed from organisms from  
98 environmental samples (e.g., water and soils), this technique allows non-invasive  
99 assessment of biodiversity. Its efficiency in detecting species has been illustrated by studies  
100 showing that the number of marine fish species detected by eDNA analysis was comparable  
101 to or larger than that detected by traditional sampling methods, such as visual census  
102 (Thomsen et al. 2012; Sigsgaard et al. 2017; Yamamoto et al. 2017). Furthermore, owing to  
103 the short persistence (from a few hours [Murakami et al. 2019] to several days [Thomsen et  
104 al. 2012]) and low diffusion rate (less than 100 m; Port et al. 2016; Murakami et al. 2019)  
105 of eDNA in seawater, this technique enables the estimation of contemporary and local  
106 species composition. Taking advantage of this technique has the potential to help evaluate  
107 the relative importance of environmental and spatial processes in a whole fish community,  
108 but such applicability has not been tested so far.

109 The objectives of this study were (1) to determine whether the relative importance  
110 of environmental and spatial processes of marine fish community assembly changes  
111 seasonally and (2) to explore how the severity of the environment affects their relative  
112 importance. This study was conducted in Tokyo Bay, one of the largest bay areas in Japan.

113 Its environment is known to be subject to large seasonal changes. In particular, lower  
114 concentrations of dissolved oxygen in summer induced by stratification of water columns  
115 (Yasui et al. 2016) can serve as a severe environment for fish species, especially in the  
116 bottom water (Kodama and Horiguchi 2011). To test the hypothesis that seasonal changes  
117 in environmental severity induce a shift in the relative importance of environmental and  
118 spatial processes, we used one-year monthly monitoring data on fish community  
119 assemblages at 14 sites in Tokyo Bay, which were obtained by eDNA analyses of samples  
120 collected from both surface and bottom waters. The variation partitioning method was  
121 applied to decompose the variation in species composition into those explained by  
122 environmental or spatial variables.

123

## 124 **Materials and methods**

### 125 *Water sampling and eDNA sequencing*

126 Water samples were collected monthly from 14 sites in Tokyo Bay, Japan  
127 (approximately 1380 km<sup>2</sup>, 35°30'N, 139°50'E, Fig. S1) from January to December 2019. At  
128 each sampling, 1 L of water each was collected the surface and bottom waters. Bottom  
129 depth varied among sites from approximately 6 to 70 m. Water samples were filtered using  
130 a GF/F membrane (0.7 µm pore size; Cytiva, Sheffield, UK) per litre, and the filters were  
131 frozen on board a ship. The frozen filters were then transferred to and stored in the  
132 laboratory. The extraction of eDNA was performed as described by Yamamoto et al.  
133 (2016).

134 Water temperature, salinity, and dissolved oxygen (DO) were measured at the  
135 same time as water sampling. We also measured four additional variables (chlorophyll-a  
136 concentration, turbidity, conductivity, and water density), but they contained numerous  
137 missing values because of some logistic problems and thus were not used in the analyses.  
138 To examine whether the three main variables well represented the overall environment, we  
139 calculated Spearman's rank correlation coefficient for each pair of the full (seven) variables  
140 from a limited number of samples. The correlation analysis indicated that the  
141 environmental variables that were not included in the main analyses were highly correlated  
142 with at least one of the three main variables (water temperature, salinity, and DO)  
143 (Spearman's rank correlation coefficient > 0.5 or < -0.5, Table S1).

144 For the eDNA samples, we employed a two-step polymerase chain reaction  
145 approach to amplify the mitochondrial 12S rRNA gene using MiFish universal primers  
146 developed by Miya et al. (2015). The detailed procedure is provided in Hongo et al.

147 (submitted). The constructed amplicon sequencing variants (ASVs) were assigned to fish  
148 species using Blastn against the MitoFish database (Sato et al. 2018). To keep the dataset  
149 free from unexpected biases such as sequencing errors or contamination from nearby fish  
150 markets, some of the species that did not meet the following criteria were filtered out from  
151 the further analyses: (1) those whose names were not matched during the search in Fishbase,  
152 a global database of fish (Froese and Pauly 2019; <https://www.fishbase.se/>), and (2) those  
153 whose habitats were known to be out of Tokyo Bay based on information from several  
154 literatures (Nakabo 2002, Kouno et al. 2011). The first criterion mainly filtered out hybrid  
155 species, while the second one, which was based on each fish species' distribution in Japan  
156 and observation records in Tokyo Bay, removed fish species known to be endemic in other  
157 regions or countries.

158 We obtained 308 water samples, and eDNA extraction and gene amplification  
159 were successful for 281 samples (91%). Among these, corresponding environmental data  
160 were available for 225 samples (n = 22, 22, 22, 21, 20, 20, 18, 21, 20, 2, 15, and 22 from  
161 January to December, respectively), which were submitted to the variation partitioning  
162 analysis described below. A total of 220 fish species were detected in 225 samples. Of  
163 these, our first criterion filtered out 12 species, and the second criterion eliminated 40  
164 species, resulting in 168 species retained in the subsequent analyses (Table S2).

165

### 166 *Statistical analyses*

167 All statistical analyses were performed using R version 4.0.2 (R Core Team 2020).  
168 First, to capture the seasonal trend of the environment, we conducted a principal component  
169 analysis (PCA) on the three environmental variables (water temperature, salinity, and DO).



170 To visualise the seasonal changes in the species composition, we conducted nonmetric  
171 multidimensional scaling (NMDS) on the whole species composition data (n=281) using  
172 the *metaMDS* function in the *vegan* package (Oksanen et al. 2019). This procedure allows  
173 the compositional dissimilarity among data to be interpreted in a low-dimensional space by  
174 positioning similar data nearby. For the NMDS analysis, we used the Jaccard dissimilarity  
175 index on the presence-absence dataset and three dimensions (k=3) to facilitate convergence.  
176 Confirming that using the Sorensen dissimilarity index did not qualitatively alter the result,  
177 we illustrated the results obtained by using the Jaccard dissimilarity index. Because our  
178 hypothesis focused on the consequences of the severe environment in summer, especially in  
179 the bottom water, we tested the difference in the species composition among the bottom  
180 and surface waters for each month separately, using permutational multivariate analysis of  
181 variance (PERMANOVA; Anderson 2001) implemented by the *adonis* function with 9,999  
182 permutations.

183 The relative importance of environmental and spatial processes was evaluated  
184 using the variation partitioning method (Borcard et al. 1992). Specifically, we conducted a  
185 series of distance-based redundancy analyses (db-RDA, Legendre and Anderson 1999)  
186 separately for each sampling month. This multivariate analysis takes the dissimilarity  
187 (Jaccard index based on presence-absence data) matrix of species composition among  
188 samples as a response variable and three types of variables (environment, horizontal space,  
189 and vertical space) as explanatory variables. The variables of horizontal and vertical space  
190 are referred to as “space” and “water depth”, respectively, for brevity hereafter. Conducting  
191 a series of db-RDAs with different combinations of these three explanatory variables allows  
192 the variation of the response variable to be partitioned into several components (Borcard et

193 al. 1992; Fig. 1), that is, (1) the unique contribution of environmental ([a] in Fig. 1), spatial  
194 ([b]), and water depth variables ([c]); and (2) the combined effect of each pair of the three  
195 variables ([d], [e], [f]), or that of the three variables ([g]). The unique contribution of  
196 environmental variables reflects strong environmental filtering, whereas that of spatial and  
197 water depth variables suggests that species composition is spatially structured irrespective  
198 of the environment (Borcard et al. 1992). The combined effects of the variables indicate  
199 that the explanatory variables are correlated (e.g., the environment is spatially structured),  
200 and thus the contribution of each variable is inseparable.

201 Environmental variables included normally scaled (mean = 0, SD = 1) values of  
202 the three environmental variables (water temperature, salinity, and DO). Spatial variables  
203 were obtained using principal coordinates of neighbour matrices (PCNM; Borcard et al.  
204 2004) which extract the spatial pattern of multiple scales from the coordinates of the  
205 sampling sites. From this, eight PCNM axes with positive eigenvalues were created using  
206 the *pcnm* function with a threshold of 11,323 m (Fig. S1). As for water depth, we used the  
207 identity of the depth of the water sampling (i.e. surface or bottom). We conducted  
208 complementary analyses using the absolute value of the water depth, confirming that the  
209 main results were qualitatively similar. To maintain consistency with the other analysis  
210 (PERMANOVA), we show the results obtained using the identity of the water depth as an  
211 explanatory variable in the main text. To enable the comparison of the results of the  
212 variation partitioning analysis among different sampling months, we avoided performing  
213 variable selection before variation partitioning. However, regarding the spatial variable,  
214 including all the PCNM values is known to result in the overestimation of their explanatory  
215 power by capturing quasi-random spatial variation (Gilbert and Bennett 2010), and we did

216 note such observations in our dataset (Supplemental result, Fig. S2). Therefore, we  
217 conducted forward selection separately for the spatial variables based on their *P*-values for  
218 each season (eight PCNM values) following Blanchet et al. (2008) using the *capscale* and  
219 *ordistep* functions in the *vegan* package. The environmental variables, water depth, and  
220 selected spatial variables were subjected to variation partitioning analysis using the *varpart*  
221 function. Due to the small number of sampling sites ( $n = 2$ ) because of logistical problems,  
222 we did not conduct a variation partitioning analysis for the October data.  
223

## 224 **Results**

225           The PCA of the three environmental variables clarified their seasonal trends (Fig.  
226 2). The first two PC axes explained 90.8% of the total variance. The first axis positively  
227 correlated with salinity ( $r = 0.935$ ) and negatively correlated with temperature ( $r = -0.703$ )  
228 and DO ( $r = -0.443$ ), and the second axis positively correlated with DO ( $r = 0.859$ ) and  
229 negatively correlated with temperature ( $r = -0.645$ ). Low concentrations of DO and  
230 differences between the surface and bottom waters were apparent from June to September.  
231 Parallel with this, water salinity diverged between samples such that the surface water was  
232 characterised by lower salinity, which is likely a result of the rainy season in June. Due to  
233 this divergence in the environment, the overall heterogeneity of the environment was  
234 apparently high from June to September, compared to that in the other months.

235           The NMDS illustrated the seasonal changes in species composition (Fig.3).  
236 Throughout the study period, species composition was significantly different between the  
237 surface and bottom waters in most months ( $P < 0.05$ , PERMANOVA, statistics are shown  
238 in Fig. 3), except for October and November. However, we observed an abrupt decrease in  
239 the  $R^2$  value in June, suggesting that the surface-bottom separation of species composition  
240 was weaker during summer and post-summer (June to December).

241           The variation partitioning analysis based on db-RDA explained a moderate  
242 proportion of the variation in species composition (19.3% of the total variance, averaged  
243 for months, Fig. 4a). Overall, the environment, space, and water depth contributed to a  
244 similar degree of variation (11.5%, 10.2%, and 7.9%, respectively, averaged over months).

245 However, the effect of each variable showed a seasonal variation, particularly during June  
246 and July. Some of the contribution of environmental variables was confounded with that of  
247 water depth from March to September, but that component almost disappeared in June and  
248 July (Fig. 4b). In contrast, the pure contribution of spatial variables was larger in June and  
249 July than that in the other months (Fig. 4c). Regarding the proportion explained by water  
250 depth, its contribution was low during June and July, as well as during November and  
251 December.  
252

## 253 **Discussion**

254 In this study, we tested the hypothesis that the relative importance of environmental and  
255 spatial processes of marine fish community assembly changes seasonally in response to the  
256 shift in the environmental severity. Overall, species composition was explained by  
257 environmental and spatial variables to a similar extent, coinciding with previous evidence  
258 of environmental filtering (Mouchet et al. 2013, Pecuchet et al. 2016) and stochastic  
259 assembly (Sale 1978, Ford and Roberts 2018) in marine fish communities. However, during  
260 summer, when a lower concentration of oxygen serves as a severe environment for the  
261 organisms, the pure contribution of spatial variables was large, suggesting that fish species  
262 composition was spatially structured irrespective of environmental heterogeneity.

263         The increase in the pure contribution of spatial processes in June and July reflects  
264 the discrepancy in the timing of the divergence of the environment and species composition.  
265 Although fish species composition was dissimilar between the surface and bottom waters  
266 throughout the year, the differences were less evident in summer and the subsequent season,  
267 as indicated by lower  $R^2$  values (Fig. 3). Conversely, the environment started to diverge  
268 between the surface and bottom waters around May and June (Fig. 2), likely because of the  
269 stratification of water columns, which induces lower DO in the bottom water (Yasui et al.  
270 2016), and the rainy season in June, which decreases the salinity of the surface water. This  
271 indicates that, during summer, fish species composition was more similar between the  
272 surface and bottom waters despite the higher heterogeneity of the environment, which  
273 should have resulted in a weaker explanatory power of the environmental variables (Fig.4b).  
274 As the surface and bottom waters were sampled at the same sites sharing the same  
275 coordinates, the compositional similarity between the surface and bottom waters was

276 detected as the apparent effect of spatial variables in the variation partitioning analysis  
277 (Fig.4c). In contrast, from March to May, the species composition was clearly divided  
278 between the surface and bottom waters (Fig. 3). As the surface–bottom distinctiveness in  
279 the environment was also evident during that period (Fig. 2), variation partitioning  
280 indicated that the importance of the environment was structured in the depth direction (Fig.  
281 4b).

282         The results indicate that environmental filtering is less important during the  
283 summer when DO is limited. Contrary to our findings, some previous studies have shown  
284 that environmental filtering is stronger in harsher environments in terms of abiotic stress  
285 (Chase 2007, Guo et al. 2014), productivity (Chase 2010), and disturbance (Lepori and  
286 Malmqvist 2009) because of the reduced probability of ecological drift and alternative  
287 stable states. However, others have suggested the possibility of a more stochastic assembly  
288 (i.e. weaker environmental filtering) in harsher environments, because extreme  
289 environments can induce death of individuals irrespective of species identity (Lepori and  
290 Malmqvist 2009) or because species that survive very stressful conditions may share  
291 similar traits and be nearly neutral (Kim et al. 2019). In the present study, we argue that the  
292 former mechanism of species-independent loss by environmental harshness is likely due to  
293 the following evidence on the number and occurrence probabilities of species detected: the  
294 number of detected species decreased in the bottom water and increased in the surface  
295 water from June and July (Fig. S3), suggesting that individuals in the bottom water were  
296 forced to move toward the surface (Pihl et al. 1991) or perhaps experienced higher  
297 mortality due to the depletion of oxygen (Kodama and Horiguchi 2011). Furthermore,  
298 given that the species composition became less distinctive in June and July (Fig. 3), it is

299 likely that such movement or extinction occurred without deterministic selection,  
300 irrespective of species identity. Supporting this, for 13 out of the 16 most common species  
301 (the top 10% in our dataset), the relative occurrence probability in the bottom versus that in  
302 the surface waters was lower during June and July than that in other months. For example,  
303 *Lateolabrax japonicus* (Japanese sea bass), the third most common species, was detected in  
304 48.7% of the surface water samples and 71.1% of the bottom water samples during the  
305 study period, except for June and July, suggesting a preference for the bottom environment.  
306 However, in June and July, when the bottom environment was severe, the occurrence  
307 probability was even lower at the bottom (53.8%) than that at the surface (56.2%). These  
308 results collectively suggest that the limited oxygen in the bottom water during June and  
309 July adversely affects the performance of fish individuals, irrespective of their species  
310 identity. Importantly, the seasonal shift in the importance of environmental filtering could  
311 be detected only by comparing the environment and species composition between the  
312 surface and bottom waters. Indeed, a previous study which did not consider the  
313 bottom-surface distinction showed no seasonal trend in the strength of environmental  
314 filtering (Mouchet et al. 2013). Therefore, to examine the seasonal changes in the assembly  
315 processes of marine fish communities that are inherently structured both vertically and  
316 horizontally, incorporating the vertical dimension into community assembly studies is  
317 essential.

318 Our finding that the assembly processes of marine fish communities changed  
319 seasonally challenges the perspective that natural systems are at equilibrium. The  
320 equilibrium assumption can be seen in previous studies that disentangled the assembly  
321 processes based on snapshot data collected at one time. Although such studies have



322 provided pivotal insights into the mechanisms determining species composition, increasing  
323 evidence shows that the relative importance of environmental and spatial processes varies  
324 temporally (Allen et al. 2011, Alexander et al. 2012), suggesting that inferences from  
325 snapshot data would be insufficient for a holistic understanding of the mechanisms that  
326 shape community structures across a long temporal scale (Chang and HilleRisLambers  
327 2016). More importantly, we revealed a seasonal shift in the assembly processes, which is a  
328 much shorter time scale than previously investigated (several years to several decades; but  
329 see Fitzgerald et al. 2017). Previous findings suggested that environmental processes  
330 replace spatial ones as the assembly progresses, postulating that communities approach  
331 equilibrium in the long run (Allen et al. 2011, Alexander et al. 2012). In contrast, our  
332 results provide an alternative view that the relative importance of the two processes can  
333 temporally fluctuate without any direction. This may be particularly true for marine fish  
334 communities, because fishes have high mobility, and thus their distribution and species  
335 composition can change quickly in response to seasonal environmental changes (Travers et  
336 al. 2006, Kopp et al. 2012). Therefore, when studying the community assembly processes  
337 of mobile organisms such as fish, more insights may be gained by incorporating two types  
338 of temporal perspective, that is, toward-equilibrium dynamics that occur over a long-time  
339 scale and non-equilibrium fluctuations that occur in a short-time scale. When studying  
340 community assembly processes from snapshot data, care should be taken because analysing  
341 data from a single season may over- or underestimate the significance of the environmental  
342 and spatial processes.

343           Although the ability of eDNA to detect species from environmental samples has  
344 been well examined (Thomsen et al. 2012; Sigsgaard et al. 2017; Yamamoto et al. 2017),

345 this technique has rarely been applied to the evaluation of community assembly processes.  
346 Our results indicate that eDNA analysis can clearly reveal the relative importance of  
347 environmental and spatial processes in fish community assembly, in combination with the  
348 availability of environmental variables. However, most of the variation (nearly 80%) in the  
349 species composition remained unexplained by environmental, spatial, and water depth  
350 variables (Fig. 4), although a comparable level of low explanatory power is common in  
351 these kinds of analyses (e.g., 13%–21% for marine fish communities [Ford and Robert  
352 2018] and 36.7% for forest communities [Borcard et al. 1992]). We suspect that the main  
353 reason for this may be that the dataset we used contained only presence–absence  
354 information. Estimating species abundance data from eDNA samples is challenging  
355 because the correlation between eDNA concentration and abundance of target fish species  
356 is variable under natural conditions (Yates et al. 2019). To avoid potentially biased results,  
357 we did not use the read number of DNA as an abundance index, which might result in a  
358 loss of information. Furthermore, since the detection of eDNA is influenced not only by the  
359 presence of the species but also by the degradation and accumulation of the eDNA itself  
360 (“ecology of eDNA” sensu Barnes and Turner 2016), our results may have been subject to  
361 such biases. Previous studies have shown that the degradation of eDNA after release into  
362 water is faster at higher temperatures (Tsuji et al. 2017, Jo et al. 2019), and it has been  
363 assumed that eDNA accumulates in surface waters (Eichmiller et al. 2014, Moyer et al.  
364 2014). These may be a source of bias in our results by affecting the detection probability of  
365 the species. However, we consider that this was not the case here or at least not so  
366 influential, because the number of detected species was higher in summer (when

367 degradation is expected to be faster due to higher temperatures) and in samples from the  
368 bottom (where accumulation is expected to be reduced) (Fig. S3).  
369

370 **Conclusion**

371           In ecosystems, species assemblages are the result of a combination of  
372 environmental and spatial assembly processes. We found that, in marine fish communities,  
373 their relative importance changes seasonally, such that vertically structured environmental  
374 gradients became less influential during summer, the season characterised by a lower  
375 concentration of DO. This result suggests that the effect of environmental filtering is weak  
376 in an extremely severe environment, likely due to the random loss of individuals. We  
377 conclude that marine fish communities are dynamic and, therefore, it would be a fruitful  
378 approach to incorporate short-scale temporal perspectives in studying their assembly  
379 processes. Furthermore, by applying the eDNA analyses for evaluating community  
380 assembly processes for the first time to our best knowledge, this study highlights the  
381 potential applications of this promising technique across a wide range of disciplines of  
382 community ecology.

383

384 **Acknowledgements**

385 We thank Dr. Y. Miyazaki for helping with the filtering of fish species for the use of

386 analyses with reference to records in Tokyo Bay.

387

388 **Funding**

389 This work was supported by the Project for establishing a network of environmental and  
390 fisheries information.

391

## 392 References

- 393 1. Hutchinson, G. E. 1959. Homage to Santa Rosalia or Why Are There So Many Kinds of Animals?  
394 Am. Nat. 93:145–159.
- 395 2. HilleRisLambers, J., P. B. Adler, W. S. Harpole, J. M. Levine, and M. M. Mayfield. 2012.  
396 Rethinking Community Assembly through the Lens of Coexistence Theory. *Annu. Rev. Ecol. Evol.*  
397 S. 43:227–248. doi:[10.1146/annurev-ecolsys-110411-160411](https://doi.org/10.1146/annurev-ecolsys-110411-160411)
- 398 3. Cottenie, K. 2005. Integrating environmental and spatial processes in ecological community  
399 dynamics. *Ecol. Lett.* 8:1175–1182. doi:[10.1111/j.1461-0248.2005.00820.x](https://doi.org/10.1111/j.1461-0248.2005.00820.x)
- 400 4. Mouillot, D. 2007. Niche-assembly vs. dispersal-assembly rules in coastal fish metacommunities:  
401 implications for management of biodiversity in brackish lagoons. *J. Appl. Ecol.* 44:760–767.  
402 doi:[10.1111/j.1365-2664.2007.01330.x](https://doi.org/10.1111/j.1365-2664.2007.01330.x)
- 403 5. Chase, J. M., and J. A. Myers. 2011. Disentangling the importance of ecological niches from  
404 stochastic processes across scales. *Philos. Trans. R. Soc. Lond. B. Biol. Sci.* 366:2351–2363.  
405 doi:[10.1098/rstb.2011.0063](https://doi.org/10.1098/rstb.2011.0063)
- 406 6. Sale, P. F. 1978. Coexistence of coral reef fishes - a lottery for living space. *Environ. Biol. Fishes*  
407 3:85–102. doi:10.1007/BF00006310
- 408 7. Hubbell, S. P. *The Unified Neutral Theory of Biodiversity and Biogeography*. Princeton; Oxford:  
409 Princeton University Press; 2001.
- 410 8. Ford, B. M., and J. D. Roberts. 2018. Latitudinal gradients of dispersal and niche processes  
411 mediating neutral assembly of marine fish communities. *Mar. Biol.* 165:1–13. doi:  
412 doi.org/10.1007/s00227-018-3356-5
- 413 9. Allen, M. R., J. N. VanDyke, and C. E. Cáceres. 2011. Metacommunity assembly and sorting in  
414 newly formed lake communities. *Ecology* 92:269–275. doi:10.1890/10-0522.1
- 415 10. Alexander, H. M., B. L. Foster, F. Ballantyne IV, C. D. Collins, J. Antonovics, and R. D. Holt. 2012.  
416 Metapopulations and metacommunities: Combining spatial and temporal perspectives in plant  
417 ecology. *J. Ecol.* 100:88–103. doi:[10.1111/j.1365-2745.2011.01917.x](https://doi.org/10.1111/j.1365-2745.2011.01917.x)

- 418 11. Helsen, K., M. Hermy, and O. Honnay. 2013. Spatial isolation slows down directional plant  
419 functional group assembly in restored semi-natural grasslands. *J. Appl. Ecol.* 50:404–413.  
420 doi:[10.1111/1365-2664.12037](https://doi.org/10.1111/1365-2664.12037)
- 421 12. Chang, C., and J. HilleRisLambers. 2016. Integrating succession and community assembly  
422 perspectives. *F1000Res.* 5:1–10. doi:[10.12688/f1000research.8973.1](https://doi.org/10.12688/f1000research.8973.1)
- 423 13. Holyoak, M., T. Caspi, and L. W. Redosh. 2020. Integrating Disturbance, Seasonality, Multi-Year  
424 Temporal Dynamics, and Dormancy Into the Dynamics and Conservation of Metacommunities.  
425 *Front. Ecol. Evol.* 8:1–17. doi: 10.3389/fevo.2020.571130
- 426 14. Fitzgerald, D. B., K. O. Winemiller, M. H. Sabaj Pérez, and L. M. Sousa. 2017. Seasonal changes in  
427 the assembly mechanisms structuring tropical fish communities. *Ecology* 98:21–31.  
428 doi:[10.1002/ecy.1616](https://doi.org/10.1002/ecy.1616)
- 429 15. Mouchet, M. A., M. D. M. Burns, A. M. Garcia, J. P. Vieira, and D. Mouillot. 2013. Invariant scaling  
430 relationship between functional dissimilarity and co-occurrence in fish assemblages of the Patos  
431 Lagoon estuary (Brazil): Environmental filtering consistently overshadows competitive exclusion.  
432 *Oikos* 122:247–257. doi:[10.1111/j.1600-0706.2012.20411.x](https://doi.org/10.1111/j.1600-0706.2012.20411.x)
- 433 16. Chase, J. M. 2007. Drought mediates the importance of stochastic community assembly. *PNAS.*  
434 104:17430–17434. doi:[10.1073/pnas.0704350104](https://doi.org/10.1073/pnas.0704350104)
- 435 17. Guo, H., K. Wieski, Z. Lan, and S. C. Pennings. 2014. Relative influence of deterministic processes  
436 on structuring marsh plant communities varies across an abiotic gradient. *Oikos* 123:173–178.  
437 doi:[10.1111/j.1600-0706.2013.00425.x](https://doi.org/10.1111/j.1600-0706.2013.00425.x)
- 438 18. Lepori, F., and B. Malmqvist. 2009. Deterministic control on community assembly peaks at  
439 intermediate levels of disturbance. *Oikos* 118:471–479. doi:[10.1111/j.1600-0706.2008.16989.x](https://doi.org/10.1111/j.1600-0706.2008.16989.x)
- 440 19. Travers, M. J., S. J. Newman, and I. C. Potter. 2006. Influence of latitude, water depth, day v. night  
441 and wet v. dry periods on the species composition of reef fish communities in tropical Western  
442 Australia. *J. Fish Biol.* 69:987–1017. doi:[10.1111/j.1095-8649.2006.01179.x](https://doi.org/10.1111/j.1095-8649.2006.01179.x)
- 443 20. Kopp, D., Y. Bouchon-Navaro, M. Louis, P. Legendre, and C. Bouchon. 2012. Spatial and temporal



- 444 variation in a caribbean herbivorous fish assemblage. *J. Coast. Res.* 28:63–72.  
445 doi:10.2112/JCOASTRES-D-09-00165.1
- 446 21. McClain, C. R., M. A. Rex. 2015. Toward a conceptual understanding of beta-diversity in the  
447 deep-sea benthos. *Annu. Rev. Ecol. Evol. S.* 46:623–642.  
448 doi:[10.1146/annurev-ecolsys-120213-091640](https://doi.org/10.1146/annurev-ecolsys-120213-091640)
- 449 22. Yamamoto, S., R. Masuda, Y. Sato, T. Sado, H. Araki, M. Kondoh, T. Minamoto, M. Miya, 2017.  
450 Environmental DNA metabarcoding reveals local fish communities in a species-rich coastal sea. *Sci.*  
451 *Rep.* 7:40368. doi:10.1038/srep40368
- 452 23. Bohmann, K., A. Evans, M. T. P. Gilbert, G. R. Carvalho, S. Creer, M. Knapp, D. W. Yu, M. de  
453 Bruyn. 2014. Environmental DNA for wildlife biology and biodiversity monitoring. *Trends Ecol.*  
454 *Evol.* 29:358–367. doi:[10.1016/j.tree.2014.04.003](https://doi.org/10.1016/j.tree.2014.04.003)
- 455 24. Deiner, K., H. M. Bik, E. Mächler, M. Seymour, A. Lacoursière-Roussel, F. Altermatt, S. Creer, I.  
456 Bista, D. Lodge, N. de Vere, et al. 2017. Environmental DNA metabarcoding: Transforming how we  
457 survey animal and plant communities. *Mol. Ecol.* 26:5872–5895. doi:10.1111/mec.14350
- 458 25. Lacoursière-Roussel, A., K. Howland, E. Normandeau, E. K. Grey, P. Archambault, K. Deiner, D. M.  
459 Lodge, C. Hernandez, N. Leduc, L. Bernatchez. 2018. eDNA metabarcoding as a new surveillance  
460 approach for coastal Arctic biodiversity. *Ecol. Evol.* 8:7763–7777. doi:[10.1002/ece3.4213](https://doi.org/10.1002/ece3.4213)
- 461 26. Thomsen, P. F., J. Kielgast, L. L. Iversen, P. R. Møller, M. Rasmussen, and E. Willerslev. 2012.  
462 Detection of a Diverse Marine Fish Fauna Using Environmental DNA from Seawater Samples.  
463 *PLoS ONE* 7(8): e41732. doi:[10.1371/journal.pone.0041732](https://doi.org/10.1371/journal.pone.0041732)
- 464 27. Sigsgaard, E. E., I. B. Nielsen, H. Carl, M. A. Krag, S. W. Knudsen, Y. Xing, T. H. Holm-Hansen, P.  
465 R. Møller, P. F. Thomsen. 2017. Seawater environmental DNA reflects seasonality of a coastal fish  
466 community. *Mar. Biol.* 164:1–15. doi:10.1007/s00227-017-3147-4
- 467 28. Murakami, H., S. Yoon, A. Kasai, T. Minamoto, S. Yamamoto, M. K. Sakata, T. Horiuchi, H.  
468 Sawada, M. Kondoh, Y. Yamachita, et al. 2019. Dispersion and degradation of environmental DNA  
469 from caged fish in a marine environment. *Fish. Sci.* 85:327–337. doi:10.1007/s12562-018-1282-6

- 470 29. Port, J. A., J. L. O'Donnell, O. C. Romero-Maraccini, P. R. Leary, S. Y. Litvin, K. J. Nickols, K. M.  
471 Yamahara, R. P. Kelly, 2016. Assessing vertebrate biodiversity in a kelp forest ecosystem using  
472 environmental DNA. *Mol. Ecol.* 25:527–541. doi:10.1111/mec.13481
- 473 30. Yasui, S., J. Kanda, T. Usui, and H. Ogawa. 2016. Seasonal variations of dissolved organic matter  
474 and nutrients in sediment pore water in the inner part of Tokyo Bay. *J. Oceanogr.* 72:851–866.  
475 doi:10.1007/s10872-016-0382-0
- 476 31. Kodama, K., and T. Horiguchi. 2011. Effects of hypoxia on benthic organisms in Tokyo Bay, Japan:  
477 A review. *Mar. Pollut. Bull.* 63:215–220. doi:[10.1016/j.marpolbul.2011.04.022](https://doi.org/10.1016/j.marpolbul.2011.04.022)
- 478 32. Yamamoto, S., K. Minami, K. Fukaya, K. Takahashi, H. Sawada, H. Murakami, S. Tsuji, H.  
479 Hashizume, S. Kubonaga, T. Horiuchi, et al. 2016. Environmental DNA as a “snapshot” of fish  
480 distribution: A case study of Japanese jack mackerel in Maizuru Bay, Sea of Japan. *PLoS ONE*  
481 11(3): e0149786. doi:[10.1371/journal.pone.0149786](https://doi.org/10.1371/journal.pone.0149786)
- 482 33. Miya, M., Y. Sato, T. Fukunaga, T. Sado, J. Y. Poulsen, K. Sato, T. Minamoto, S. Yamamoto, H.  
483 Yamanaka, H. Araki, et al. 2015. MiFish, a set of universal PCR primers for metabarcoding  
484 environmental DNA from fishes: Detection of more than 230 subtropical marine species. *R. Soc.*  
485 *Open Sci.* 2: 150088. doi:10.1098/rsos.150088
- 486 34. Hongo, Y., S. Nishijima, Y. Kanamori, S. Sawayama, K. Yokouchi, N. Kanda, S. Oori, Y. Uto, M.  
487 Ishii, H. Mita, et al. (submitted) Fish environmental DNA in Tokyo Bay: A feasibility study on the  
488 availability of environmental DNA for fisheries.
- 489 35. Sato, Y., M. Miya, T. Fukunaga, T. Sado, and W. Iwasaki. 2018. MitoFish and mifish pipeline: A  
490 mitochondrial genome database of fish with an analysis pipeline for environmental DNA  
491 metabarcoding. *Mol. Biol. Evol.* 35:1553–1555. doi:10.1093/molbev/msy074
- 492 36. Froese, R., and D. Pauly. (Eds). 2019. FishBase. World Wide Web electronic publication.  
493 [www.fishbase.org](http://www.fishbase.org), version (12/2019).
- 494 37. Nakabo, T. (Ed.) 2002. Fishes of Japan with Pictorial Keys to the Species. Kanagawa: Tokai  
495 University Press. [in Japanese]

- 496 38. Kouno, H., H. Kanou, and T. Yokoo. (Eds.) 2011. A Photographic Guide to the Fishes in Tokyo Bay.  
497 Tokyo: Heibon-sha. [in Japanese]
- 498 39. R Core Team. 2020. R: A language and environment for statistical computing. R Foundation for  
499 Statistical Computing, Vienna, Austria. URL <https://www.R-project.org/>.
- 500 40. Oksanen, J., F. G. Blanchet, M. Friendly, R. Kindt, P. Legendre, D. McGlinn, P. R. Minchin, R. B.  
501 O'Hara, G. L. Simpson, P. Solymos, et al. (2019). vegan: Community Ecology Package. R package  
502 version 2.5-6. <https://CRAN.R-project.org/package=vegan>
- 503 41. Anderson, M. J. M. 2001. A new method for non-parametric multivariate analysis of variance.  
504 Austral Ecol. 26:32–46. doi:[10.1111/j.1442-9993.2001.01070.pp.x](https://doi.org/10.1111/j.1442-9993.2001.01070.pp.x)
- 505 42. Borcard, D., P. Legendre, and P. Drapeau. 1992. Partialling out the Spatial Component of Ecological  
506 Variation. Ecology 73:1045–1055. doi:[10.2307/1940179](https://doi.org/10.2307/1940179)
- 507 43. Legendre, P., and M. J. Anderson. 1999. Distance-based redundancy analysis: Testing multispecies  
508 responses in multifactorial ecological experiments. Ecol. Monogr. 69:1–24.  
509 doi:[10.1890/0012-9615\(1999\)069\[0001:DBRATM\]2.0.CO;2](https://doi.org/10.1890/0012-9615(1999)069[0001:DBRATM]2.0.CO;2)
- 510 44. Borcard, D., P. Legendre, C. Avois-Jacquet, and H. Tuomisto. 2004. Dissecting the spatial structure  
511 of ecological data at multiple scales. Ecology 85:1826–1832. doi:[10.1890/03-3111](https://doi.org/10.1890/03-3111)
- 512 45. Gilbert, B., and J. R. Bennett. 2010. Partitioning variation in ecological communities: Do the  
513 numbers add up? J. Appl. Ecol. 47:1071–1082. doi:[10.1111/j.1365-2664.2010.01861.x](https://doi.org/10.1111/j.1365-2664.2010.01861.x)
- 514 46. Blanchet, F. G., P. Legendre, and D. Borcard. 2008. Forward selection of explanatory variables.  
515 Ecology 89:2623–2632. doi:[10.1890/07-0986.1](https://doi.org/10.1890/07-0986.1)
- 516 47. Pécuchet, L., A. Törnroos, and M. Lindegren. 2016. Patterns and drivers of fish community  
517 assembly in a large marine ecosystem. Mar. Ecol. Prog. Ser. 546:239–248. doi:[10.3354/meps11613](https://doi.org/10.3354/meps11613)
- 518 48. Chase, J. M. 2010. Stochastic community assembly causes higher biodiversity in more productive  
519 environments. Science 328:1388–1391. doi:[10.1126/science.1187820](https://doi.org/10.1126/science.1187820)
- 520 49. Kim, D. 2019. Selection of scale can reverse the importance of stochastic controls on community  
521 assembly. Phys. Geogr. 40:111–126. doi:[10.1080/02723646.2018.1548831](https://doi.org/10.1080/02723646.2018.1548831)

- 522 50. Pihl, L., S. P. Baden, and R. J. Diaz. 1991. Effects of periodic hypoxia on distribution of demersal  
523 fish and crustaceans. *Marine Biology* 108:349–360. doi: 10.1007/BF01313644
- 524 51. Yates, M. C., D. J. Fraser, and A. M. Derry. 2019. Meta-analysis supports further refinement of  
525 eDNA for monitoring aquatic species-specific abundance in nature. *Environ. DNA* 1:5–13.  
526 doi:[10.1002/edn3.7](https://doi.org/10.1002/edn3.7)
- 527 52. Barnes, M. A., and C. R. Turner. 2016. The ecology of environmental DNA and implications for  
528 conservation genetics. *Conserv. Genet.* 17:1–17. doi:10.1007/s10592-015-0775-4
- 529 53. Tsuji, S., M. Ushio, S. Sakurai, T. Minamoto, and H. Yamanaka. 2017. Water temperature-dependent  
530 degradation of environmental DNA and its relation to bacterial abundance. *PLoS ONE*  
531 12(4):e0176608. doi:[10.1371/journal.pone.0176608](https://doi.org/10.1371/journal.pone.0176608)
- 532 54. Jo, T., H. Murakami, S. Yamamoto, R. Masuda, and T. Minamoto. 2019. Effect of water temperature  
533 and fish biomass on environmental DNA shedding, degradation, and size distribution. *Ecol. Evol.*  
534 9:1135–1146. doi:[10.1002/ece3.4802](https://doi.org/10.1002/ece3.4802)
- 535 55. Eichmiller, J. J., P. G. Bajer, and P. W. Sorensen. 2014. The relationship between the distribution of  
536 common carp and their environmental DNA in a small lake. *PLoS ONE* 9(11): e112611.  
537 doi:[10.1371/journal.pone.0112611](https://doi.org/10.1371/journal.pone.0112611)
- 538 56. Moyer, G. R., E. Díaz-Ferguson, J. E. Hill, and C. Shea. 2014. Assessing environmental DNA  
539 detection in controlled lentic systems. *PLoS ONE* 9(7): e103767. doi:[10.1371/journal.pone.0103767](https://doi.org/10.1371/journal.pone.0103767)
- 540

541 **Figures and tables**

542 Figure 1 Schematic representation of the inference of community assembly processes  
543 using the variation partitioning approach. Variation in the species composition  
544 is decomposed into components explained by environmental and spatial  
545 variables, and water depth: [a-c] Pure contribution of each of the variables. [d-f]  
546 Combined contribution of each pair of the three variables and [g] that of the  
547 three variables, which indicates that the variables are correlated (e.g., the  
548 environment is spatially structured) and thus their contribution is inseparable.

549

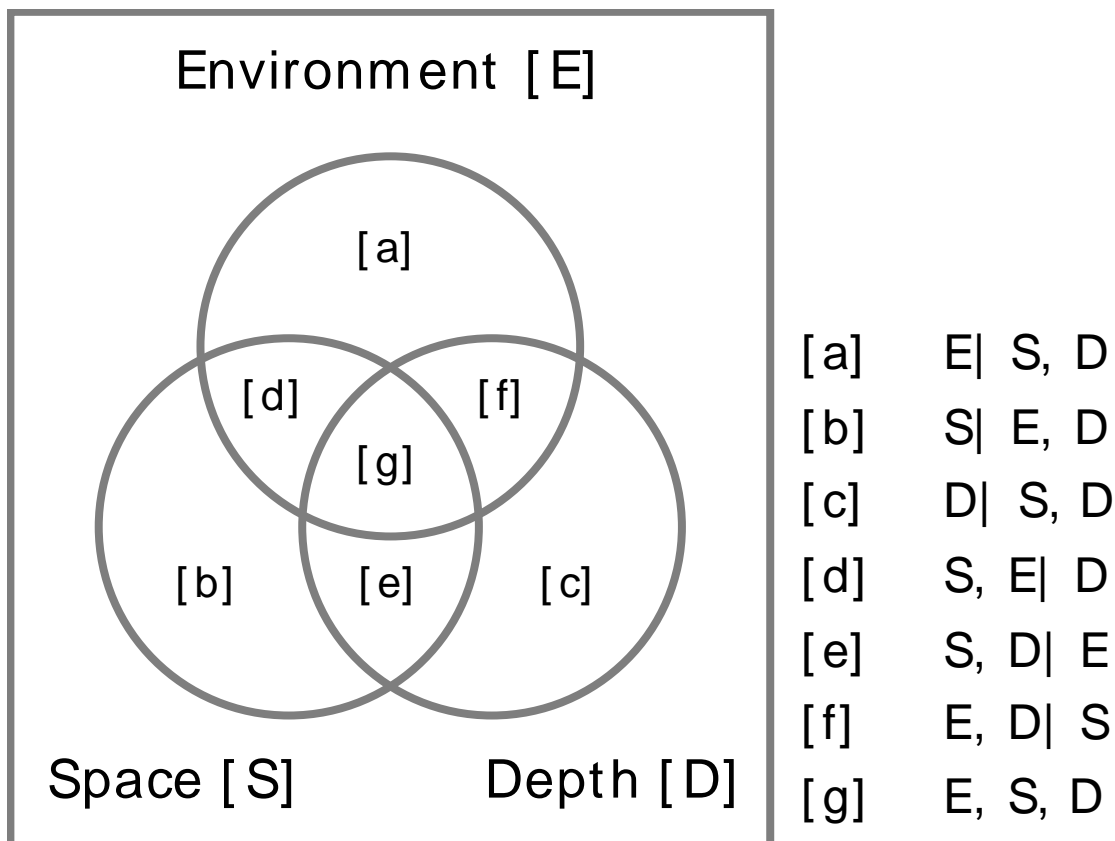

550

551

552 Figure 2 Principal component analysis of three environmental variables (water  
553 temperature [Temp], salinity [Sal], and dissolved oxygen [DO]) illustrated  
554 separately for each month. Arrows in the top-left panel indicate the three  
555 original environmental variables. Point colour represents the difference in the  
556 water depth of the sampling (red: surface, blue: bottom). Note that the number  
557 of data is smaller than that of species composition (Fig. 3) because of some  
558 logistic problems, especially for October.  
559

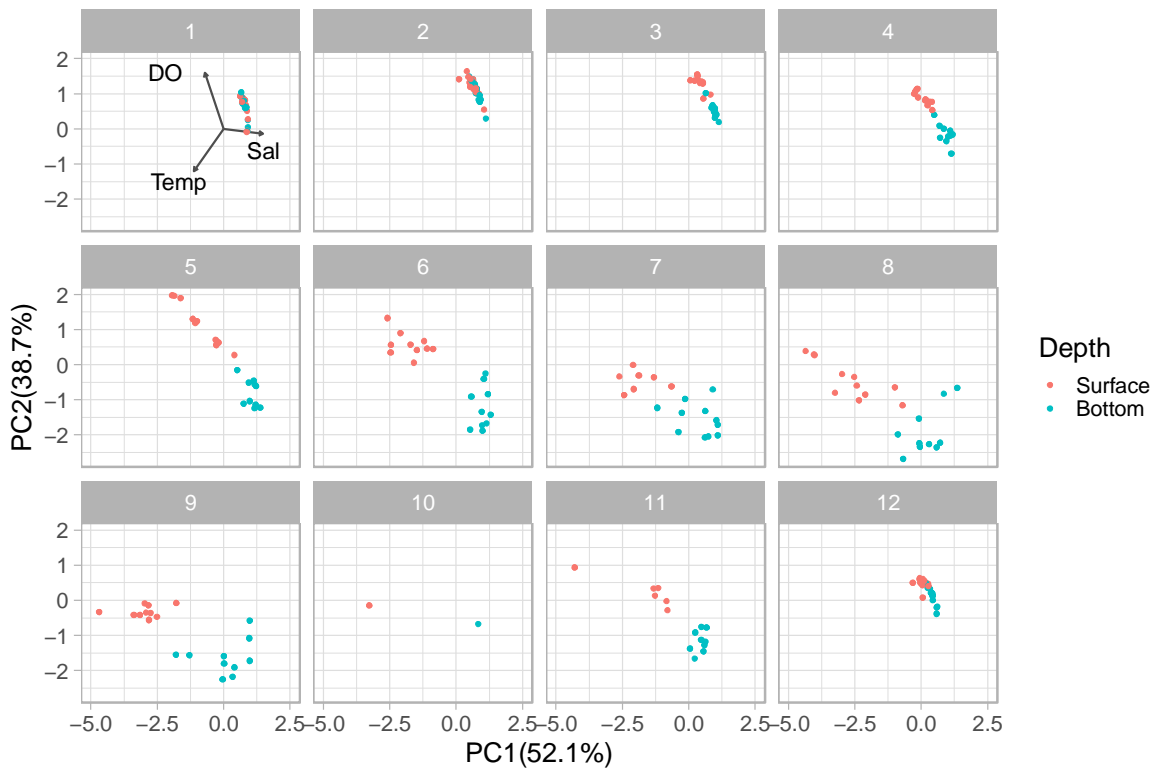

560

561

562 Figure 3 Nonmetric multidimensional scaling (NMDS) results for species composition  
563 based on Jaccard dissimilarity. Point colour represents the difference in the  
564 water depth of the sampling (red: surface, blue: bottom). Values in each panel  
565 are the statistics from the permutational multivariate analysis of variance that  
566 tested the difference in species composition between the surface and bottom  
567 waters ( $R^2$  value is shown with  $P$ -value in parentheses). Stress value of the  
568 NMDS is 0.193.  
569

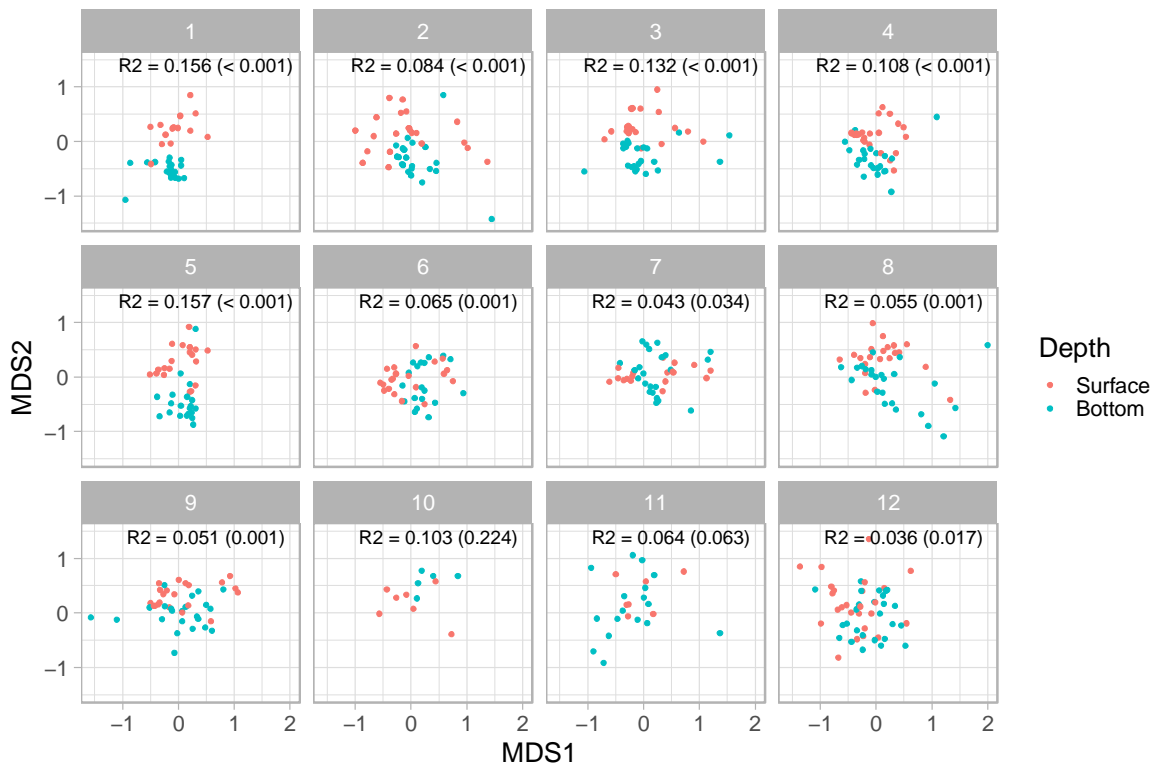

570

571

572 Figure 4 (a) Variation partitioning of species composition into components explained by  
 573 environment (E), space (S), water depth (D), and their combinations. Each of  
 574 the pure and combined components (see Fig. 1) are illustrated with different  
 575 colours. (b-d) Same results of the variation partitioning, but the components are  
 576 illustrated separately for environment, space, and depth for visualization  
 577 purposes. The analysis was not conducted for the October data because of the  
 578 small number of data ( $n = 2$ ).  
 579

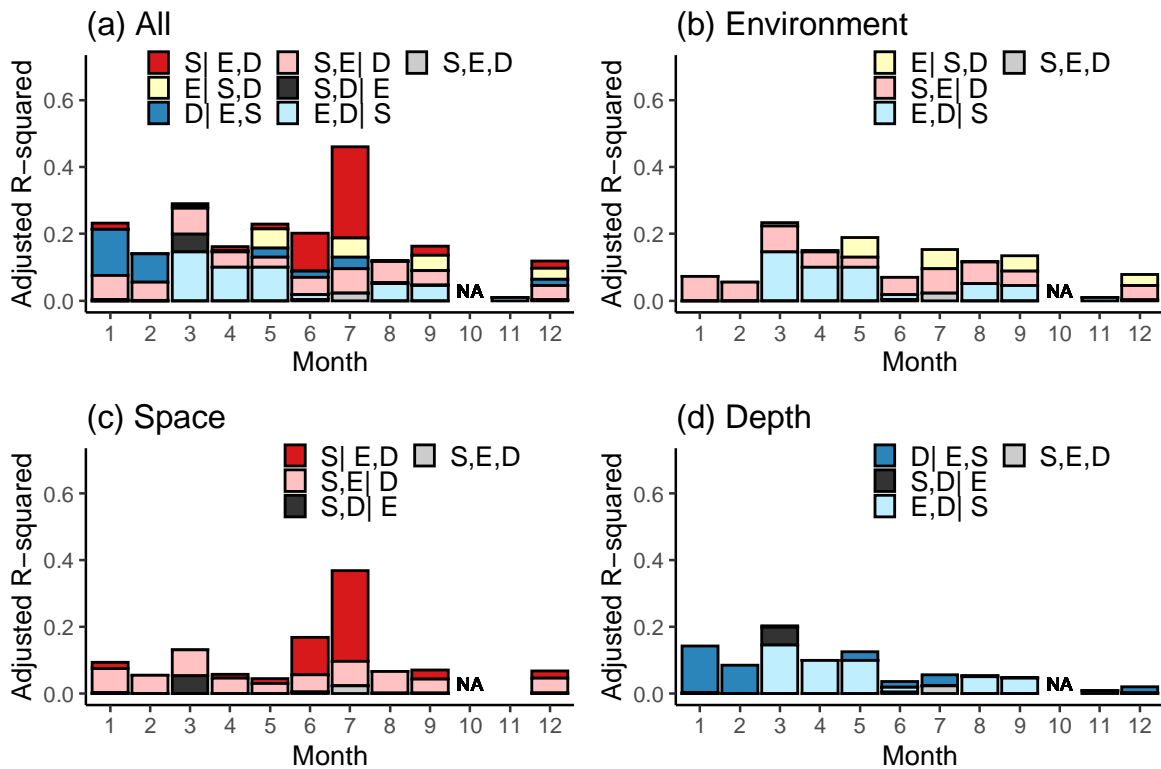

580

581
